# Supplementary material
Source: HighWire-hosted journal article supplement (https://erj.ersjournals.com/highwire/filestream/113686/field_highwire_adjunct_files/0/ERJ-01293-2012_Disclosures.pdf)
Supplement: ERJ-01293-2012_Disclosures.pdf [file ERJ-01293-2012_Disclosures.pdf]

**J.R. Davidsen** was sponsored to participate at the European Respiratory Society Congress in 2009 by AstraZeneca, and was sponsored to participate in the Inspiration Congress 2011 and 2012, arranged by Novartis; and has received a fee from AstraZeneca for organising education for specialty registrars in respiratory medicine in 2010.

**M. Andersen** has participated in other research projects funded by AstraZeneca, Lundbeck, Merck Sharp & Dohme, Novartis, Nycomed and Pfizer; and taught at pharmacoepidemiology courses arranged by Medicademy, the Danish Association of the Pharmaceutical Industry.
